# Supplementary material for: MRI-based Algorithm for Acute Ischemic Stroke Subtype Classification
Source: PubMed Central journal article supplement — J Stroke. 2014 Sep 30;16(3):161–72. doi: 10.5853/jos.2014.16.3.161 (PMC4200592; doi:10.5853/jos.2014.16.3.161), 2014-09-30
Supplement: jos-16-161-s001.pdf [file jos-16-161-s001.pdf]

**Supplementary Table 1.** Other explainable etiology (non-cardioembolic, non-atherothromboembolic, or non-lacunar cause) of acute ischemic stroke

---

|                                                                                                                          |
|--------------------------------------------------------------------------------------------------------------------------|
| Abnormalities of thrombosis and hemostasis                                                                               |
| Acute arterial dissection                                                                                                |
| Acute disseminated intravascular coagulation                                                                             |
| CADASIL (Cerebral autosomal-dominant arteriopathy with subcortical infarcts and leukoencephalopathy cerebral vasculitis) |
| Cerebral venous thrombosis                                                                                               |
| Chronic arterial dissection                                                                                              |
| Clinically relevant aneurysm                                                                                             |
| Drug-induced stroke                                                                                                      |
| Fibromuscular dysplasia                                                                                                  |
| Heparin-induced thrombocytopenia type II                                                                                 |
| Hyperviscosity syndromes                                                                                                 |
| Hypoperfusion syndromes                                                                                                  |
| Iatrogenic causes                                                                                                        |
| Meningitis                                                                                                               |
| Migraine-induced stroke                                                                                                  |
| MELAS (Mitochondrial encephalomyopathy with lactic acidosis and stroke-like episodes)                                    |
| Moyamoya disease                                                                                                         |
| Primary antiphospholipid antibody syndrome                                                                               |
| Primary infection of the arterial wall                                                                                   |
| Segmental vasoconstriction or vasospasm                                                                                  |
| Sickle cell disease                                                                                                      |
| Sneddon syndrome                                                                                                         |
| Thrombotic thrombocytopenic purpura – hemolytic uremic syndrome                                                          |

---
