# Supplementary material for: MRI-based Algorithm for Acute Ischemic Stroke Subtype Classification
Source: PubMed Central journal article supplement — J Stroke. 2014 Sep 30;16(3):161–72. doi: 10.5853/jos.2014.16.3.161 (PMC4200592; doi:10.5853/jos.2014.16.3.161), 2014-09-30
Supplement: jos-16-161-s002.pdf [file jos-16-161-s002.pdf]

**Supplementary Table 2.** Cardioembolic sources of ischemic stroke

|                                                           |
|-----------------------------------------------------------|
| Sources of high primary risk of stroke                    |
| Left atrial thrombus                                      |
| Left ventricular thrombus                                 |
| Atrial fibrillation                                       |
| Paroxysmal atrial fibrillation                            |
| Sick sinus syndrome                                       |
| Atrial flutter                                            |
| Recent myocardial infarction (<4 weeks)                   |
| Rheumatic mitral or aortic valve disease                  |
| Bioprosthetic or mechanical heart valves                  |
| Chronic myocardial infarction with ejection fraction <28% |
| Congestive heart failure with ejection fraction <30%      |
| Dilated cardiomyopathy                                    |
| Nonbacterial thrombotic endocarditis                      |
| Infective endocarditis                                    |
| Papillary fibroelastoma                                   |
| Left atrial myxoma                                        |
| Sources of low or uncertain primary risk of stroke        |
| Mitral annulus calcification                              |
| Patent foramen ovale                                      |
| Atrial septal aneurysm                                    |
| Atrial septal aneurysm and patent foramen ovale           |
| Ventricular aneurysm without thrombus                     |
| Isolated left atrial stroke                               |
| Complex atheroma in the ascending or proximal arch        |
