# Supplementary material for: MRI-based Algorithm for Acute Ischemic Stroke Subtype Classification
Source: PubMed Central journal article supplement — J Stroke. 2014 Sep 30;16(3):161–72. doi: 10.5853/jos.2014.16.3.161 (PMC4200592; doi:10.5853/jos.2014.16.3.161), 2014-09-30

**Supplementary Figure 1.** Validation study of MRI-based algorithm for acute ischemic stroke classification (MAGIC).

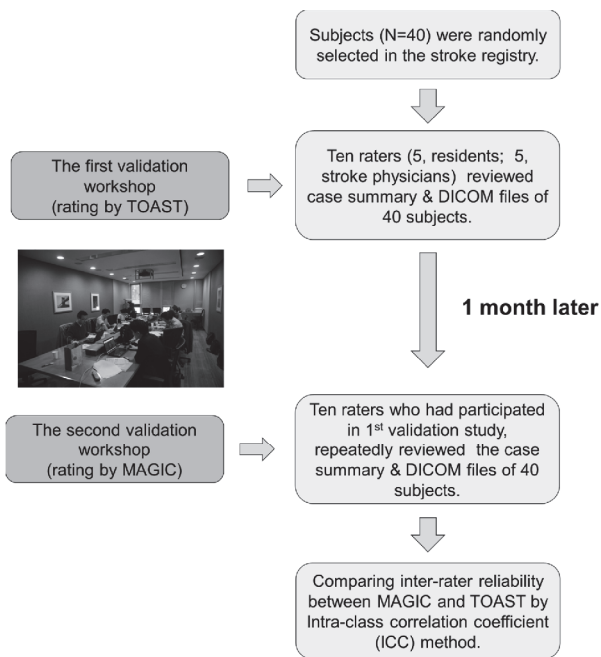

Supplement: jos-16-161-s003.pdf [file jos-16-161-s003.pdf]
